# Supplementary material
Source: Springer Nature journal article supplement (https://www.springermedizin.de/resource/supplementary/12913_2010_1468_MOESM2_ESM.pdf/9528204)
Supplement: MOESM2 [file 9528204]

Developing the code manual based on the research questions & theoretical concepts of the A4R framework

```
graph TD; A[Developing the code manual based on the research questions & theoretical concepts of the A4R framework] --> B[Labelling (coding) the data to initial themes (using Nvivo 8 software)]; B --> C[Sorting the data by matching the codes with segments of text (using Nvivo 8 software)]; C --> D[Connecting the codes and identifying patterns]; D --> E[Summarising and synthesising the data];
```

Labelling (coding) the data to initial themes (using Nvivo 8 software)

Sorting the data by matching the codes with segments of text (using Nvivo 8 software)

Connecting the codes and identifying patterns

Summarising and synthesising the data
